# Supplementary material
Source: publisher site journal article supplement (https://www.dovepress.com/article/387110)
Supplement: Supplementary file 1 [file get_supplementary_file.php]

**Supplementary file 1: The English and the Greek version of the ICDQ Questionnaire**

The English version of the ICDQ Questionnaire

|  | Frequency (F) | | | | Intensity (I) | | | |
| --- | --- | --- | --- | --- | --- | --- | --- | --- |
| During CISC | 0  Never | 1  Sometimes | 2  Often | 3 Always | 0  None | 1  A little | 2  Moderate | 3  Considerable |
| I have pain (or: The CISC is painful) | 0 | 1 | 2 | 3 | 0 | 1 | 2 | 3 |
| I experience a transitory blocking sensation, which quickly subsides, with no need to force the catheter or wait | 0 | 1 | 2 | 3 | 0 | 1 | 2 | 3 |
| I experience a blocking sensation, and need to wait before continuing to insert the catheter | 0 | 1 | 2 | 3 | 0 | 1 | 2 | 3 |
| I experience a blocking sensation, and some force is required to insert the catheter | 0 | 1 | 2 | 3 | 0 | 1 | 2 | 3 |
| It feels as if steady progression of the catheter is being blocked along the full length of the urethra | 0 | 1 | 2 | 3 | 0 | 1 | 2 | 3 |
| It feels as if a solid obstacle is blocking the catheter, and that I need to stop the CISC for a while | 0 | 1 | 2 | 3 | 0 | 1 | 2 | 3 |
| I am obliged to adopt another position or assist by inserting my fingers to remove the blocking sensation | 0 | 1 | 2 | 3 | 0 | 1 | 2 | 3 |
| I have leg spasticity, leg pain, chills, headache, sweating | 0 | 1 | 2 | 3 | 0 | 1 | 2 | 3 |
| I have urethral bleeding | 0 | 1 | 2 | 3 | 0 | 1 | 2 | 3 |
| I need to adopt another position or assist by inserting my fingers in order to empty my bladder | 0 | 1 | 2 | 3 | 0 | 1 | 2 | 3 |
| I have a blocking sensation during catheter withdrawal | 0 | 1 | 2 | 3 | 0 | 1 | 2 | 3 |
| I have urinary incontinence during catheterization | 0 | 1 | 2 | 3 | 0 | 1 | 2 | 3 |
| I have residual pain after the catheterization | 0 | 1 | 2 | 3 | 0 | 1 | 2 | 3 |

**The Greek version of the ICDQ Questionnaire**

Ερωτήσεις και παράμετροι αξιολόγησης στο ερωτηματολόγιο ICDQ-Gr

|  | | Συχνότητα (Σ) | | | | Ένταση (Ε) | | | |
| --- | --- | --- | --- | --- | --- | --- | --- | --- | --- |
| Κατά τη διάρκεια του καθαρού διαλείποντα αυτό-καθετηριασμού (ΚΔΑΚ) | | 0 | 1 | 2 | 3 | 0 | 1 | 2 | 3 |
| 1 | O ΚΔΑΚ είναι επώδυνος |  |  |  |  |  |  |  |  |
| 2 | Αντιλαμβάνομαι μια παροδική αίσθηση απόφραξης που υποχωρεί γρήγορα, χωρίς να χρειάζεται να προωθήσω με δύναμη τον καθετήρα ή να περιμένω |  |  |  |  |  |  |  |  |
| 3 | Αντιλαμβάνομαι μια αίσθηση απόφραξης και πρέπει να περιμένω πριν συνεχίσω την εισαγωγή του καθετήρα |  |  |  |  |  |  |  |  |
| 4 | Αντιλαμβάνομαι μια αίσθηση απόφραξης και απαιτείται κάποια δύναμη για την εισαγωγή του καθετήρα |  |  |  |  |  |  |  |  |
| 5 | Αισθάνομαι ότι η σταθερή προοδευτική εισαγωγή του καθετήρα εμποδίζεται κατά το πλήρες μήκος της ουρήθρας |  |  |  |  |  |  |  |  |
| 6 | Αισθάνομαι ότι ένα σταθερό εμπόδιο σταματά τον καθετήρα και πρέπει να σταματήσω τον ΚΔΑΚ για λίγο |  |  |  |  |  |  |  |  |
| 7 | Είμαι υποχρεωμένος να εφαρμόσω άλλη στάση ή να βοηθήσω βάζοντας τα δάκτυλά μου για να απαλείψω την αίσθηση του εμποδίου |  |  |  |  |  |  |  |  |
| 8 | Έχω σπαστικότητα κάτω άκρων, πόνο στα κάτω άκρα, ρίγη, πονοκέφαλο, εφίδρωση |  |  |  |  |  |  |  |  |
| 9 | Έχω αιμορραγία στην ουρήθρα |  |  |  |  |  |  |  |  |
| 10 | Πρέπει να εφαρμόσω άλλη στάση ή να βοηθήσω βάζοντας τα δάκτυλά μου για να αδειάσω την ουροδόχο κύστη μου |  |  |  |  |  |  |  |  |
| 11 | Έχω την αίσθηση της απόφραξης κατά την αφαίρεση του καθετήρα |  |  |  |  |  |  |  |  |
| 12 | Έχω ακράτεια ούρων κατά την καθετηριασμό |  |  |  |  |  |  |  |  |
| 13 | Έχω πόνο που παραμένει μετά τον καθετηριασμό |  |  |  |  |  |  |  |  |

0 ποτέ

1 λίγες φορές

2 συχνά

3 πάντα

**Note**: Reprinted and translated with permission from Guinet‐Lacoste A, Jousse M, Tan E, et al. Intermittent catheterization difficulty questionnaire (ICDQ): a new tool for the evaluation of patient difficulties with clean intermittent self‐catheterization. Neurourol Urodyn. 2016;35(1):85‐89. © 2014 Wiley Periodicals, Inc.7
